# Supplementary material for: Modelling of the arteriovenous malformation embolization optimal scenario
Source: PubMed Central journal article supplement (PMC7428277; doi:10.1098/rsos.191992), 2020-07-22
Supplement: rsos191992supp2.pdf [file rsos191992supp2.pdf]

A. A. Cherevko, T. S. Gologush, I. A. Petrenko, V. V. Ostapenko, V. A. Panarin, Modeling of the arteriovenous malformation embolization optimal scenario, Royal Society Open Science

| Dependency table of the blood velocity $v_b$ and blood pressure $p$ in the artery on the volume average embolic agent concentration $1-\bar{S}$ |                    |        |        |        |        |        |
|-------------------------------------------------------------------------------------------------------------------------------------------------|--------------------|--------|--------|--------|--------|--------|
| Patient K                                                                                                                                       | Measurement number |        |        |        |        |        |
|                                                                                                                                                 | 1                  | 2      | 3      | 4      | 5      | 6      |
| $1-\bar{S}$                                                                                                                                     | 0,0000             | 0,2080 | 0,6053 | 0,7620 | 0,8700 | 1,0000 |
| $v_b$ [m/s]                                                                                                                                     | 0,2076             | 0,1625 | 0,0424 | 0,0562 | 0,0238 | 0,0000 |
| $p$ [mmHg]                                                                                                                                      | 58,26              | 66,33  | 80,71  | 78,53  | 76,53  | 68,68  |
| Patient T                                                                                                                                       | 1                  | 2      | 3      | 4      | 5      | 6      |
| $1-\bar{S}$                                                                                                                                     | 0,0000             | 0,3240 | 0,5610 | 0,6120 | 0,8074 | 1,0000 |
| $v_b$ [m/s]                                                                                                                                     | 0,6254             | 0,4325 | 0,4304 | 0,4381 | 0,3869 | 0,0000 |
| $p$ [mmHg]                                                                                                                                      | 40,14              | 44,75  | 45,16  | 48,89  | 59,23  | 66,47  |
| Patient P                                                                                                                                       | 1                  | 2      | 3      | 4      | 5      |        |
| $1-\bar{S}$                                                                                                                                     | 0,0000             | 0,2500 | 0,5000 | 0,6250 | 1,0000 |        |
| $v_b$ [m/s]                                                                                                                                     | 0,3875             | 0,0481 | 0,0125 | 0,0107 | 0,0000 |        |
| $p$ [mmHg]                                                                                                                                      | 49,47              | 50,11  | 52,60  | 52,12  | 53,16  |        |

| Hemodynamic and geometric parameters of patients needed to calculate absolute permeability $K$ |                         |                                       |                                            |                |              |       |                       |
|------------------------------------------------------------------------------------------------|-------------------------|---------------------------------------|--------------------------------------------|----------------|--------------|-------|-----------------------|
| Patient                                                                                        | $L$<br>[ $10^{-2}$ ]*m] | $A$<br>[ $10^{-4}$ ]*m <sup>2</sup> ] | $\omega$<br>[ $10^{-6}$ ]*m <sup>2</sup> ] | $v_{b0}$ [m/s] | $p_0$ [mmHg] |       | $K$ [m <sup>2</sup> ] |
|                                                                                                |                         |                                       |                                            | Artery         | Artery       | Vein  |                       |
| <b>K</b>                                                                                       | 2,40                    | 4,52160                               | 4,52376                                    | 0,20760        | 58,26        | 40,00 | 8,19E-11              |
| <b>T</b>                                                                                       | 2,20                    | 2,00000                               | 4,52376                                    | 0,62540        | 40,14        | 40,00 | 6,67E-08              |
| <b>P</b>                                                                                       | 3,00                    | 3,14150                               | 3,14150                                    | 0,38750        | 49,47        | 40,00 | 3,68E-10              |
| <b>S</b>                                                                                       | 3,00                    | 2,83520                               | 2,54462                                    | 0,64490        | 65,70        | 40,00 | 2,03E-10              |
| <b>I</b>                                                                                       | 1,86                    | 0,95030                               | 4,90859                                    | 0,57240        | 46,48        | 12,32 | 4,83E-10              |
| <b>B</b>                                                                                       | 3,00                    | 6,15734                               | 5,30914                                    | 0,03282        | 61,20        | 21,01 | 6,34E-12              |
| <b>A</b>                                                                                       | 1,70                    | 5,72538                               | 4,90859                                    | 0,40779        | 32,60        | 25,00 | 2,35E-10              |
| <b>C</b>                                                                                       | 3,00                    | 2,01056                               | 1,32728                                    | 0,66527        | 33,44        | 27,08 | 6,21E-10              |
| <b>Sh</b>                                                                                      | 4,40                    | 5,30914                               | 1,53934                                    | 0,52415        | 24,83        | 6,27  | 1,08E-10              |
| <b>M</b>                                                                                       | 2,83                    | 3,94070                               | 1,32728                                    | 0,39375        | 69,16        | 60,56 | 1,31E-10              |
